# Supplementary material for: Inhibition of Prolyl Oligopeptidase Restores Prohibitin 2 Levels in Psychosis Models: Relationship to Cognitive Deficits in Schizophrenia
Source: MDPI journal article supplement (doi:10.3390/ijms24076016), 2023-03-23
Supplement: s1 [file s1]

## SUPPLEMENTARY MATERIAL

Figure S1

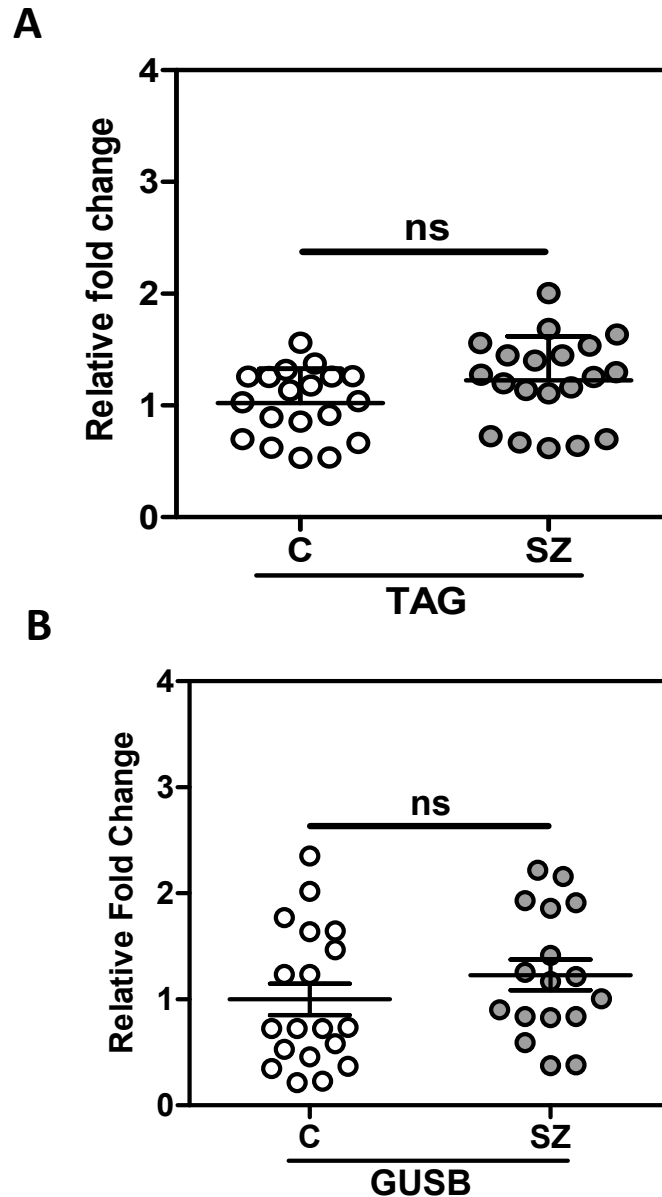

**Figure S1. The expression of the house-keeping (HK) genes and proteins is not significantly altered in the postmortem brain of schizophrenia subjects. (A)** The three-reference protein,  $\alpha$ -Tubulin (T),  $\beta$ -Actin (A) and GAPDH (G) were determined by immunoblot in prefrontal cortex samples from control individuals (n=20) and schizophrenia patients (n=20). The graph represents the geometrical mean of the HK proteins. Statistical analysis was performed using Student's t-test (n.s., not significant). **(B)** Beta glucuronidase (GUSB) levels from the prefrontal cortex of control individuals (C=19) and schizophrenia patients (SZ=17) were determined by RT-qPCR. Values represent the mean  $\pm$  standard error of the mean for each group. Mean fold-change values of each group were compared with Student's t-test (n.s, not significant).

**Figure S2**

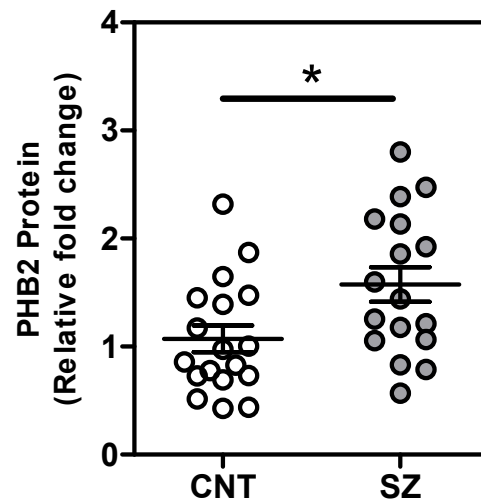

**Figure S2: Increased PHB2 protein levels in the subgroup of schizophrenia patients.** Differences between PHB2 protein levels from the prefrontal cortex of control individuals and schizophrenia patients in the cohort used for PHB2 mRNA analysis were maintained. Values represent the mean  $\pm$  standard error of the mean for each group. Mean fold-change values of each group were compared with Student's t-test (\* $p < 0.01$ ).

**Figure S3**

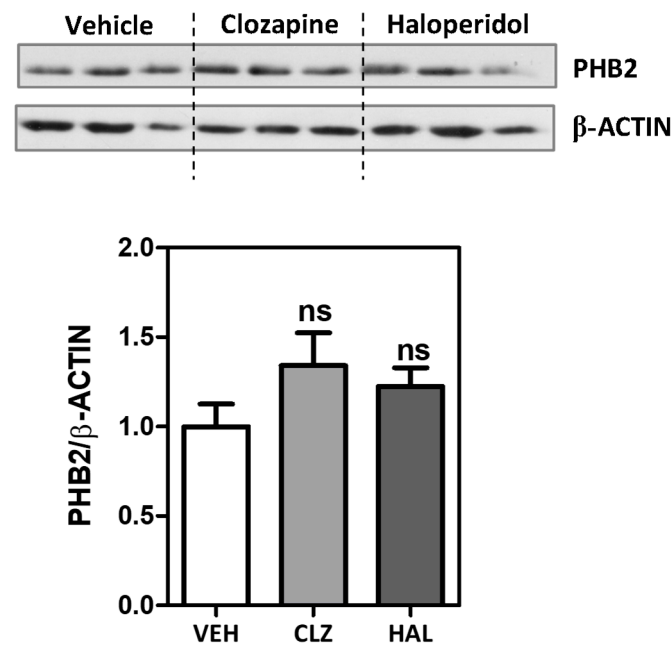

**Figure S3: No differences in PHB2 protein levels under clozapine and haloperidol treatments.**

PHB2 protein levels from the frontal cortex of Sprague Dawley rats treated with vehicle (VEH), 20 mg/kg/day clozapine (CLZ) or 0.5 mg/kg/day haloperidol (HAL) for 3 weeks were determined by immunoblot ( $n=6$ , per group). Representative Immunoblot images for PHB2 and  $\beta$ -actin in untreated and treated animals are shown. Each bar represents the mean and the standard error of the mean for each group for PHB2 and  $\beta$ -actin protein levels of at least two independent analyses. Protein levels of PHB2 were normalized to the  $\beta$ -actin values and referred to the vehicle treated animals. Statistical analysis was performed using ANOVA followed by Bonferroni's post hoc comparison between untreated condition and different treatments (ANOVA:  $F[2.15]=1.494$ ;  $p = 0.256$ ); (ns, not significant). Original western blot images are provided in supplementary information (I).

Figure S4

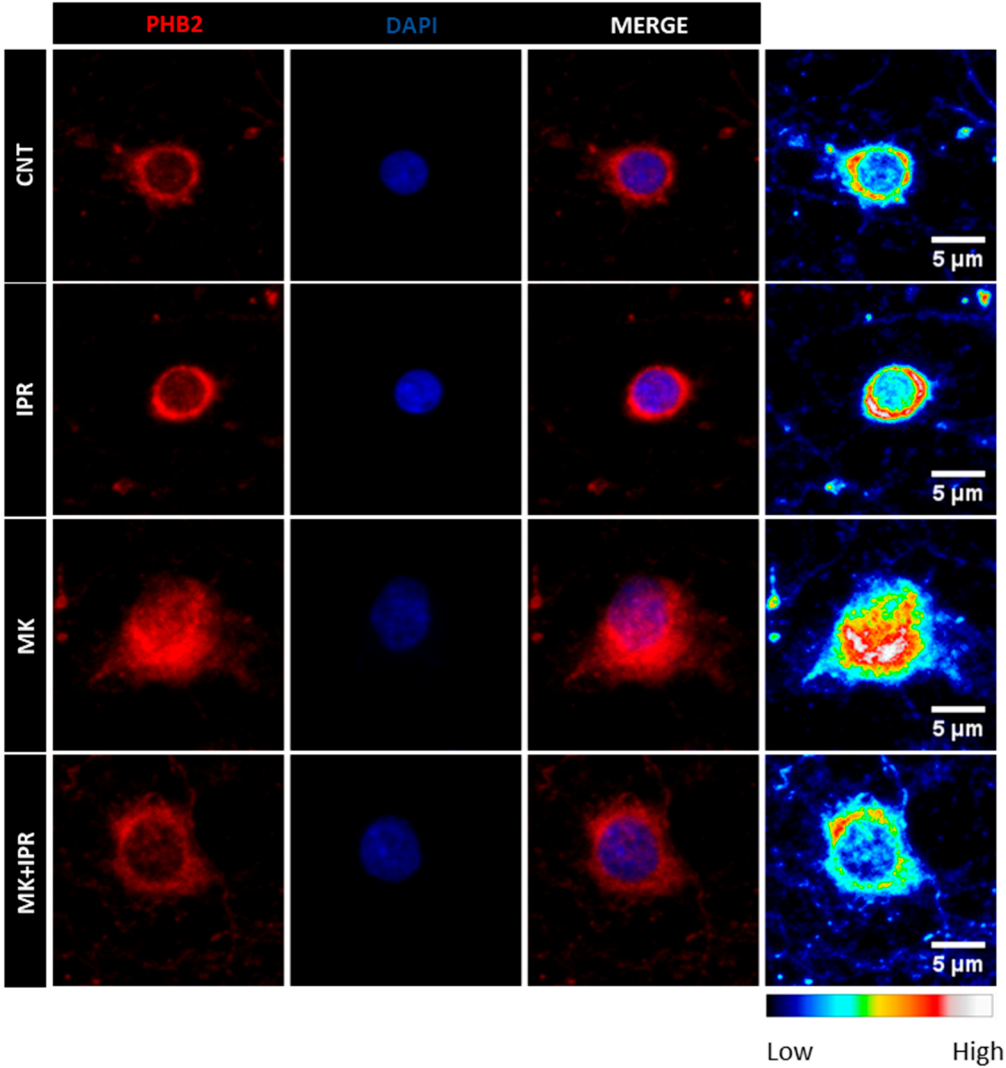

**Figure S4. Immunocytochemistry of PHB2 in cytoplasm and nucleus of cortical neurons.** Panel shows representative images of cortical neurons stained with PHB2 (1:50) and DAPI (1:400) treated with vehicle (DMSO), N-methyl-D-aspartate receptor antagonist MK801 (MK 10μM) and the prolyl oligopeptidase (IPR19 50μM) used in the region of interest analysis to determine PHB2 intensity in the cytoplasm and nucleus.

**Figure S5**

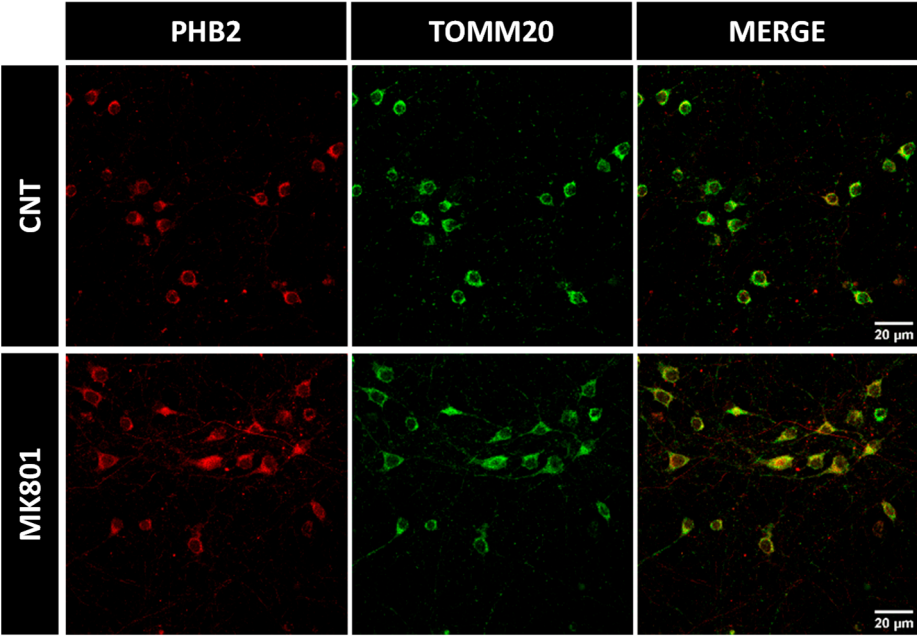

**Figure S5. Immunocytochemistry of PHB2 in cortical neurons.** Panel shows representative images of the immunostaining of PHB2 (1:50), DAPI (1:400), TOMM20 (1:100) in cortical neurons treated with vehicle (DMSO) or N-methyl-D-aspartate receptor antagonist MK801 (MK 10 $\mu$ M). Merge images show the interaction between TOMM20 and PHB2 proteins (yellow).

**Figure S6**

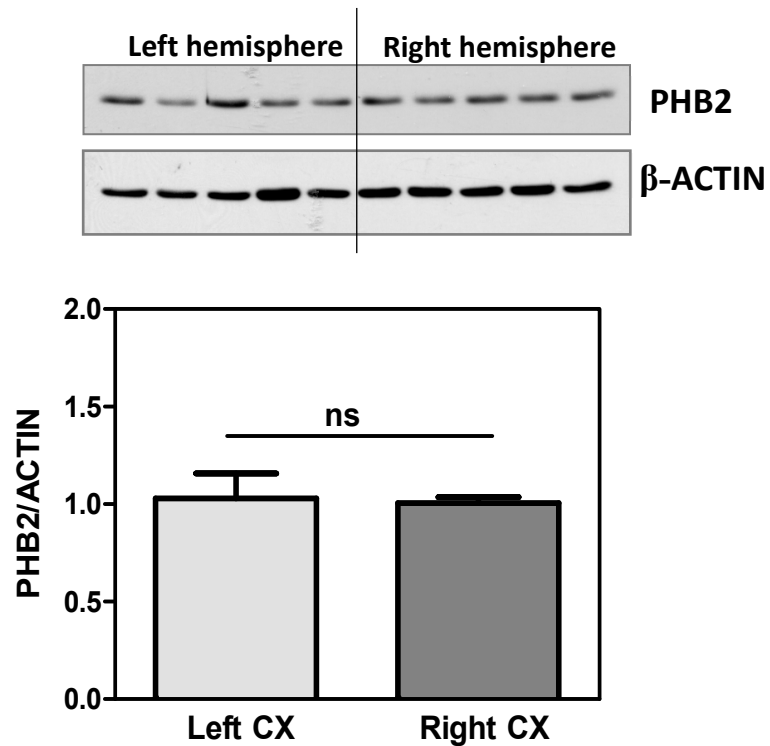

**Figure S6. PHB2 protein levels do not significantly differ between mouse brain hemispheres.** PHB2 protein levels were determined by immunoblotting in protein extracts from the left and right hemispheres of 6-month-old CD1 mice (n=5, per group). PHB2 protein levels were normalised to  $\beta$ -actin values. Images show representative PHB2 and  $\beta$ -ACTIN immunoblots. Statistical analysis was performed using two-tailed unpaired t test (ns, not significant). Original western blot images are provided in supplementary information (J).

**Figure S7**

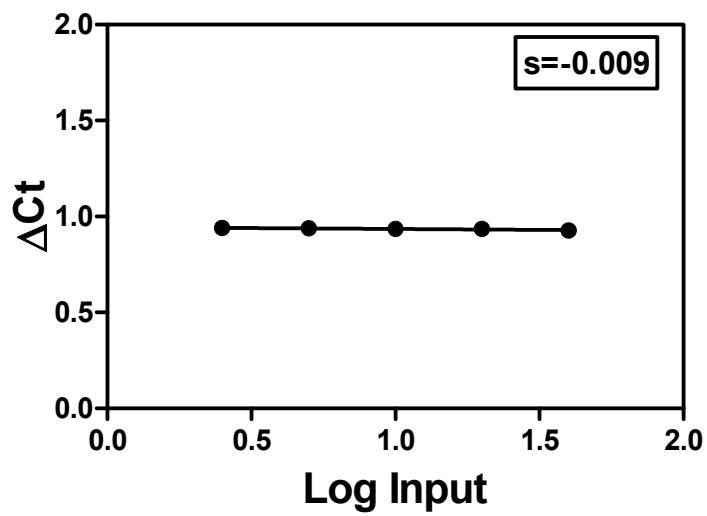

**Figure S7.  $\Delta\Delta C_t$  validation method.** PHB2 mRNA levels were analysed by qRT-PCR in prefrontal cortex in a serial dilution of a pool of control samples. PHB2 mRNA levels were normalized to GUSB levels and values were adjusted to a linear regression. The figure shows the slope of the adjusted line which is below 0.1 and therefore, passed the validation test.

**Figure S8**

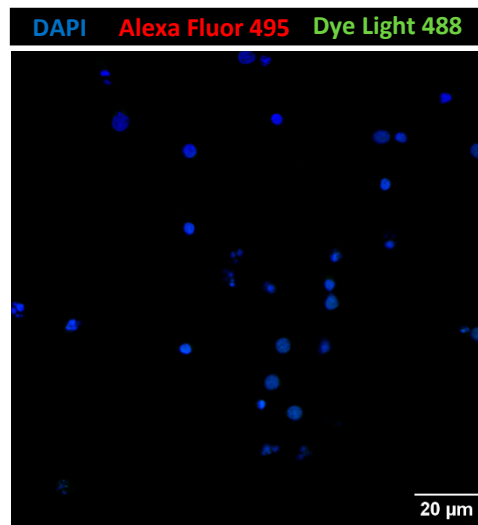

**Figure S8. Negative control for secondary antibodies.** Negative control for secondary antibodies goat anti-mouse Dye light 488 and goat anti-rabbit Alexa Fluor 594. All negative controls were used without incubating cortical neurons with the corresponding primary antibody.



**Table S1. Demographic and clinical tissue related features of cases in a subgroup of patients for mRNA analysis (n=36).**

|                                    | Schizophrenia (n=17) | Controls (n=19) | Statistic             | p value            |
|------------------------------------|----------------------|-----------------|-----------------------|--------------------|
| Gender (male)                      | 100% (n=17)          | 100% (n=19)     | N/A                   | 1.000 <sup>a</sup> |
| Age (years)                        | 74 ± 10              | 70 ± 11         | 0.89; 26 <sup>b</sup> | 0.384              |
| PMD (hours)                        | 4.62 ± 2.55          | 5.74 ± 1.67     | 1.44; 26 <sup>b</sup> | 0.160              |
| pH                                 | 6.76 ± 0.29          | 6.76 ± 0.43     | 93.00 <sup>c</sup>    | 0.849              |
| RIN                                | 7.11 ± 0.76          | 7.66 ± 0.60     | 1.91; 25 <sup>b</sup> | 0.068              |
| SZ diagnosis                       |                      | N/A             | N/A                   | N/A                |
| Chronic residual                   | 70% (n=12)           |                 |                       |                    |
| Chronic paranoid                   | 12% (n=2)            |                 |                       |                    |
| Chronic disorganized               | 6% (n=1)             |                 |                       |                    |
| Chronic catatonic                  | 6% (n=1)             |                 |                       |                    |
| Simple                             | 6%(n=1)              |                 |                       |                    |
| Age of onset of illness (years)    | 23 ± 7               | N/A             | N/A                   | N/A                |
| Duration of illness (years)        | 51 ± 9               | N/A             | N/A                   | N/A                |
| Dosage of AP (mg/day) <sup>d</sup> | 612.8 ± 544          | N/A             | N/A                   | N/A                |
| AP treatment                       |                      | N/A             | N/A                   | N/A                |
| First-generation AP                | 33% (n=5)            |                 |                       |                    |
| Second-generation AP               | 53% (n=8)            |                 |                       |                    |
| None                               | 13% (n=2)            |                 |                       |                    |

Mean ± standard deviation or relative frequency are shown for each variable; PMD, *postmortem* delay; RIN, RNA integrity Number; SZ, schizophrenia; AP, antipsychotic; N/A, not applicable.

<sup>a</sup> Fisher's exact test is shown for categorical variables

<sup>b</sup> T-statistic and degrees of freedom are shown for parametric variables.

<sup>c</sup> Mann-Whitney U is shown for non-parametric variables

<sup>d</sup> Last chlorpromazine equivalent dose was calculated based on the electronic records of drug prescriptions of the patients.

**Table S2. Association analysis of other variables in the validation cohort.**

| Correlation             | PHB2 protein       |                     |
|-------------------------|--------------------|---------------------|
|                         | SZ-C (n=40) †      | SZ (n=20)           |
| Age                     | 0.324 <sup>b</sup> | 0.342 <sup>a</sup>  |
| PMD                     | 0.096 <sup>b</sup> | 0.136 <sup>a</sup>  |
| pH                      | 0.134 <sup>b</sup> | 0.017 <sup>a</sup>  |
| Age of onset            | N/A                | 0.064 <sup>a</sup>  |
| Daily AP dose           | N/A                | -0.351 <sup>a</sup> |
| Duration of the illness | N/A                | 0.266 <sup>b</sup>  |

PMD, postmortem delay; AP, antipsychotic; N/A, not applicable. <sup>a</sup> r, Pearson's r correlation; <sup>b</sup> r', Spearman's r correlation. †An outlier was detected for PHB2 protein values by the Grubbs test and therefore excluded from the analysis (PHB2: control group, n=19, schizophrenia group, n=20). Significant associations are indicated in bold (p<0.05).

**Table S3. Confocal microscopy quantification acquisition parameters.**

|                                                   |                           |
|---------------------------------------------------|---------------------------|
| <b>Imaging format</b>                             | 1024 x1024 pixels         |
| <b>Sections number (3D)</b>                       | 10                        |
| <b>Step Z (um)</b>                                | 0.5                       |
| <b>Dynamic Range</b>                              | 12 bits                   |
| <b>Speed</b>                                      | 600 Hz (Bidirectionality) |
| <b>Objective</b>                                  | HCPLAPO CS2 63X/1.40 OIL  |
| <b>Zoom</b>                                       | 1,25                      |
| <b>Pinhole Airy</b>                               | 1                         |
| <b>Excitation wavelength and AOTF (Channel 1)</b> | 405 nm (0.6%)             |
| <b>Excitation wavelength and AOTF (Channel 2)</b> | 488 nm (18.5%)            |
| <b>Excitation wavelength and AOTF (Channel 3)</b> | 594 nm (29.9%)            |
| <b>Range emission Channel 1</b>                   | 420-465 nm                |
| <b>Range emission Channel 2</b>                   | 512-556 nm                |
| <b>Range emission Channel 3</b>                   | 606-760 nm                |
| <b>Gain Channel 1</b>                             | 11%                       |
| <b>Gain Channel 2</b>                             | 10%                       |
| <b>Gain Channel 3</b>                             | 30%                       |

Descriptive table of the acquisition parameters used in the quantification experiments which have been kept constant throughout the experimentation.
